# Supplementary material for: Alendronic Acid as Ionic Liquid: New Perspective on Osteosarcoma
Source: MDPI journal article supplement (doi:10.3390/pharmaceutics12030293), 2020-03-24
Supplement: s1 [file s1]

# Supplementary Materials: Alendronic Acid as Ionic Liquid: New Perspective on Osteosarcoma

Sónia Teixeira, Miguel M. Santos, Maria H. Fernandes, João Costa-Rodrigues and Luís C. Branco

## Experimental

### Materials

All acquired reagents were used without further purification. Alendronic acid (ALN,  $\geq 98.5\%$ ) was purchased from Molekula, 1,1,3,3-tetramethylguanidine (TMG, 99%), 1,5-diazabicyclo(4.3.0)non-5-ene (DBN, 99%), and choline chloride (ChCl, 99%), were supplied by Sigma-Aldrich, and 1-(2-hydroxyethyl)-3-methylimidazolium chloride ([C<sub>2</sub>OHMIM]Cl), 98%, was purchased at Solchemar. Methanol HPLC grade was acquired from Honeywell and deionized water was processed by Diwer Technologies water max w2 equipment.

### General Procedure (A) for the Synthesis of ALN-OSILs with Organic Superbases as Cations:

To a dispersion of alendronic acid (400 mg, 1.61 mmol) in MeOH/H<sub>2</sub>O (15 mL, 1:1) a methanolic solution of 1 or 2 molar equivalents of organic superbase (15 mg/mL) was added dropwise under magnetic stirring. After reacting for 1 h the solvent was evaporated and the desired product was dried under vacuo for 24 h.

### General Procedure (B) for the Preparation of ALN-OSILs with Ammonium and Methylimidazolium Cations:

The halide salts of the selected ammonium and methylimidazolium cations were dissolved in methanol and passed slowly through an anion-exchange column A-26(OH) (3 equivalents). The freshly formed methanolic solutions of the corresponding hydroxide salts (1 or 2 equivalents) were consequently added dropwise to alendronic acid (400 mg, 1.61 mmol) dispersed in H<sub>2</sub>O under magnetic stirring. After 1 h, the solvent of the clear solution was evaporated and the desired product was dried under vacuo for 24 h.

### Characterization

The prepared compounds were characterized by <sup>1</sup>H and <sup>13</sup>C NMR recorded on a Bruker AMX400 spectrometer. Chemical shifts are reported downfield in parts per million considering the solvent residual signal. <sup>13</sup>C NMR spectra in D<sub>2</sub>O were referenced to added MeOH or MeCN. IR spectra were recorded on a FTIR Bruker Tensor 27 Spectrometer using KBr matrixes. DSC analysis was carried out using a TA Instruments Q-series TM Q2000 DSC with a refrigerated cooling system. Between 2 and 10 mg of salt were crimped into an aluminum standard sample pan with lid which was continuously purged with nitrogen gas at 50 mL/min. The employed procedure was dependent on the melting point of the sample. A typical experiment consisted on a heating step (20 °C/min) to 125 °C (15–20 minutes), cooling (20 °C/min) to –90 °C, heating (10 °C/min) to 200 °C, cooling (10 °C/min) to –90 °C, heating (10 °C/min) to 200 °C, cooling (10 °C/min) to –90 °C, heating (20 °C/min) to 200 °C and cooling (20 °C/min) to –90 °C. Glass transition (T<sub>g</sub>), melting (T<sub>m</sub>) cold crystallization (T<sub>cc</sub>) and decomposition temperatures were determined in the heating steps, while crystallization temperatures (T<sub>c</sub>) were acquired in the cooling steps. The solubility of the salts in water and saline solution was determined by adding 5 to 10 µL of solvent to an Eppendorf containing precisely weighed ca. 30 mg of sample until a homogeneous solution is obtained upon mixture in a vortex.

### Experimental Data of the Synthesized Compounds

Preparation of bis(dimethylamino)methaniminium hydrogen (4-amino-1-hydroxy-1-phosphonobutyl)phosphonate, [TMGH][ALN] (1)

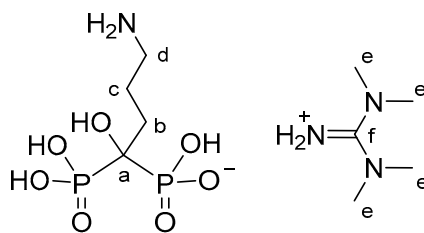

Using tetramethylguanidine (185 mg, 1.61 mmol) [TMGH][ALN] was obtained as a white solid in quantitative yield (585 mg).  $T_m = 48.1, 162.7\text{ }^\circ\text{C}$ ,  $T_{cc} = 107.1\text{ }^\circ\text{C}$ ;  $^1\text{H NMR}$  (400.13 MHz,  $\text{D}_2\text{O}$ )  $\delta$  3.07–2.99 (m, 2H, d), 2.93 (s, 12H, e), 2.06–1.92 (m, 4H, b, c).  $^{13}\text{C NMR}$  (100.62 MHz,  $\text{D}_2\text{O}$ )  $\delta$  162.0 (f), 74.1 (t,  $J = 135.3\text{ Hz}$ , a), 40.6 (d), 39.5 (e), 31.2 (c), 22.8 (t,  $J = 6.8\text{ Hz}$ , b) ppm; FTIR (KBr) 3407, 3112, 2966, 2818, 2337, 2137, 1649, 1610, 1566, 1412, 1164, 1064, 1039, 955, 916  $\text{cm}^{-1}$ . Anal. calcd for  $\text{C}_9\text{H}_{26}\text{N}_4\text{O}_7\text{P}_2 \cdot 2\text{H}_2\text{O}$ : C, 27.00; H, 7.55; N, 14.00; found: C, 27.60; H, 8.02; N, 14.25.

Preparation of bis(bis(dimethylamino)methaniminium) (4-amino-1-hydroxybutane-1,1-diyl)bis(hydrogen phosphonate), [TMGH] $_2$ [ALN] (2)

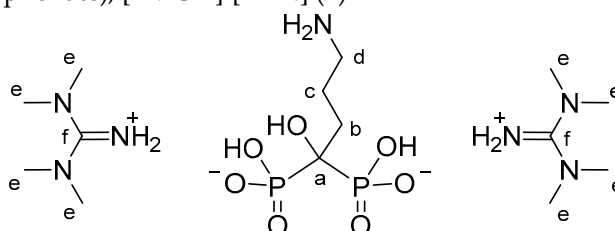

Using tetramethylguanidine (370 mg, 3.22 mmol) [TMGH] $_2$ [ALN] was obtained as a colorless paste in quantitative yield (770 mg).  $T_m = 148.8\text{ }^\circ\text{C}$ ,  $T_g = 97.5\text{ }^\circ\text{C}$ ;  $^1\text{H NMR}$  (400.13 MHz,  $\text{D}_2\text{O}$ )  $\delta$  3.07–2.98 (m, 2H, d), 2.93 (s, 24H, e), 2.02–1.88 (m, 4H, b, c);  $^{13}\text{C NMR}$  (100.62 MHz,  $\text{DMSO}-d_6$ )  $\delta$  162.1 (f), 74.2 (t,  $J = 135.1\text{ Hz}$ , a), 40.7 (d), 39.5 (e), 31.7 (c), 23.1 (t,  $J = 7.1\text{ Hz}$ , b) ppm; FTIR (KBr) 3282, 3109, 2955, 2908, 2808, 2658, 2520, 2330, 2136, 1956, 1648, 1609, 1561, 1413, 1318, 1168, 1086, 1039, 970, 927  $\text{cm}^{-1}$ . Anal. calcd for  $\text{C}_{14}\text{H}_{51}\text{N}_7\text{O}_{13}\text{P}_2 \cdot 6\text{H}_2\text{O}$ : C, 28.62; H, 8.75; N, 16.69; found: C, 28.58; H, 8.86; N, 16.69.

Preparation of 2,3,4,6,7,8-hexahydropyrrolo[1,2-a]pyrimidin-1-ium hydrogen (4-amino-1-hydroxy-1-phosphonobutyl)phosphonate, [DBNH][ALN] (3)

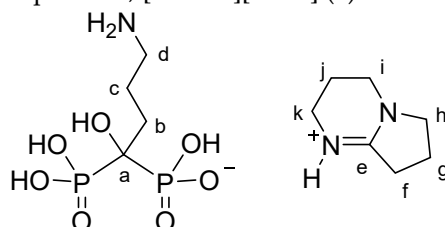

Using 1,5-diazabicyclo(4.3.0)non-5-ene (199 mg, 1.61 mmol) [DBNH][ALN] was obtained as a white solid in quantitative yield (598 mg).  $T_m = 130.3, 133.2\text{ }^\circ\text{C}$ ;  $^1\text{H NMR}$  (400.13 MHz,  $\text{D}_2\text{O}$ )  $\delta$  3.64 (t,  $J = 7.3\text{ Hz}$ , 2H, k), 3.39 (t,  $J = 5.6\text{ Hz}$ , 2H, h), 3.34 (t,  $J = 5.6\text{ Hz}$ , 2H, i), 3.07–2.98 (m, 2H, d), 2.82 (t,  $J = 8.0\text{ Hz}$ , 2H, f), 2.10 (quint,  $J = 7.6\text{ Hz}$ , 2H, g), 2.04–1.92 (m, 6H, b, c, j).  $^{13}\text{C NMR}$  (100.62 MHz,  $\text{D}_2\text{O}$ )  $\delta$  165.1 (e), 74.2 (t,  $J = 134.0\text{ Hz}$ , a), 54.1 (h), 42.9 (i), 40.7 (d), 38.7 (k), 31.3 (c), 30.7 (f), 22.8 (t,  $J = 5.5\text{ Hz}$ , b), 18.9, 18.9 (g, j) ppm; FTIR (KBr) 3423, 3125, 2965, 2885, 2804, 2580, 2360, 1680, 1648, 1588, 1399, 1310, 1146, 1068, 926, 877  $\text{cm}^{-1}$ . Anal. calcd for  $\text{C}_{11}\text{H}_{25}\text{N}_3\text{O}_7\text{P}_2 \cdot 2\text{H}_2\text{O}$ : C, 35.39; H, 6.75; N, 11.26; found: C, 35.58; H, 6.09; N, 11.39.

Preparation of bis(2,3,4,6,7,8-hexahydropyrrolo[1,2-a]pyrimidin-1-ium) (4-amino-1-hydroxybutane-1,1-diyl)bis(hydrogen phosphonate), [DBNH] $_2$ [ALN] (4)

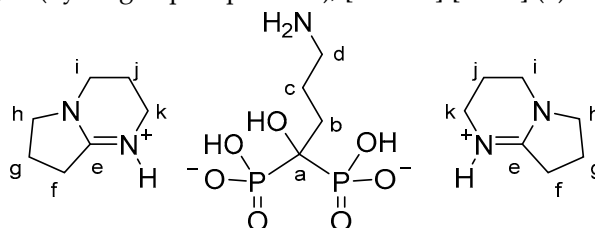

Using 1,5-diazabicyclo(4.3.0)non-5-ene (399 mg, 3.22 mmol) [DBNH]<sub>2</sub>[ALN] was obtained as a colorless paste in quantitative yield (800 mg). *T<sub>g</sub>* = 45.7 °C; <sup>1</sup>H NMR (400.13 MHz, D<sub>2</sub>O) δ 3.64 (t, *J* = 7.2 Hz, 4H, k), 3.39 (t, *J* = 5.7 Hz, 4H, h), 3.34 (t, *J* = 5.7 Hz, 4H, i), 3.06–2.97 (m, 2H, d), 2.82 (t, *J* = 8.0 Hz, 4H, f), 2.09 (quint, *J* = 7.6 Hz, 4H, g), 2.02–1.90 (m, 8H, b, c, j). <sup>13</sup>C NMR (100.62 MHz, D<sub>2</sub>O) δ 165.0 (e), 74.2 (t, *J* = 127.4 Hz, a), 54.0 (h), 42.8 (i), 40.7 (d), 38.6 (k), 31.6 (c), 30.6 (f), 23.1 (t, *J* = 7.0 Hz, b), 18.8, 18.8 (g, j) ppm; FTIR (KBr) 3425, 3224, 3127, 2966, 2887, 2785, 2652, 2555, 2360, 2342, 1681, 1648, 1590, 1401, 1309, 1166, 1069, 979 cm<sup>-1</sup>. Anal. calcd for C<sub>18</sub>H<sub>37</sub>N<sub>5</sub>O<sub>7</sub>P<sub>2</sub>·5H<sub>2</sub>O: C, 36.80; H, 8.06; N, 11.92; found: C, 36.88; H, 7.97; N, 12.01.

Preparation of (1-(2-hydroxyethyl)-3-methyl-1*H*-imidazol-3-ium) hydrogen (4-amino-1-hydroxy-1-phosphonobutyl)phosphonate, [C<sub>2</sub>OHMIM][ALN] (5)

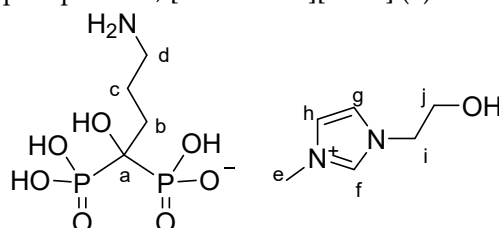

Using hydroxyethylmethylimidazolium chloride (261 mg, 1.61 mmol) [C<sub>2</sub>OHMIM][ALN] was obtained as a colorless paste in quantitative yield (660 mg). *T<sub>g</sub>* = 64.5 °C; <sup>1</sup>H NMR (400.13 MHz, D<sub>2</sub>O) δ 8.73 (br s, 1H, f), 7.49 (br s, 1H, h), 7.43 (br s, 1H, g), 4.29 (t, *J* = 4.9 Hz, 2H, i), 3.98–3.84 (m, 5H, e, j), 3.09–2.97 (m, 2H, d), 2.08–1.91 (m, 4H, b, c) ppm. <sup>13</sup>C NMR (100.62 MHz, D<sub>2</sub>O) δ 124.2 (h), 123.1 (g), 74.1 (t, *J* = 134.5 Hz, a), 60.4 (j), 52.1 (i), 40.6 (d), 36.3 (e), 31.2 (c), 22.8 (t, *J* = 6.7 Hz, b) ppm; FTIR (KBr) 3418, 3156, 3112, 2960, 2785, 2552, 2359, 2341, 1640, 1575, 1339, 1167, 1066, 917 cm<sup>-1</sup>. Anal. calcd for C<sub>10</sub>H<sub>23</sub>N<sub>3</sub>O<sub>8</sub>P<sub>2</sub>·2H<sub>2</sub>O: C, 29.20; H, 6.62; N, 10.22; found: C, 29.13; H, 6.71; N, 10.01.

Preparation of bis(1-(2-hydroxyethyl)-3-methyl-1*H*-imidazol-3-ium) (4-amino-1-hydroxybutane-1,1-diyl)bis(hydrogen phosphonate), [C<sub>2</sub>OHMIM]<sub>2</sub>[ALN]

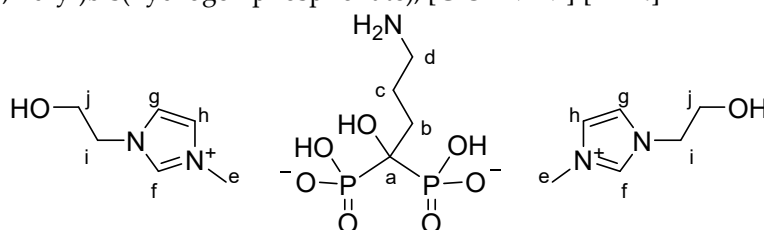

Using hydroxyethylmethylimidazolium chloride (522 mg, 3.22 mmol) [C<sub>2</sub>OHMIM]<sub>2</sub>[ALN] was obtained as a white solid in quantitative yield (921 mg). *T<sub>m</sub>* = 153.0 °C, *T<sub>g</sub>* = 46.3 °C; <sup>1</sup>H NMR (400.13 MHz, D<sub>2</sub>O) δ 7.49 (br s, 2H, h), 7.43 (br s, 2H, g), 4.30 (t, *J* = 4.9 Hz, 4H, i), 3.96–3.84 (m, 10H, e, j), 3.09–2.97 (m, 2H, d), 2.05–1.87 (m, 4H, b, c) ppm. <sup>13</sup>C NMR (100.62 MHz, D<sub>2</sub>O) δ 124.2 (h), 123.0 (g), 74.2 (t, *J* = 127.1 Hz, a), 60.3 (j), 52.1 (i), 40.7 (d), 36.3 (e), 31.6 (c), 23.1 (t, *J* = 7.1 Hz, b) ppm; FTIR (KBr) 3388, 3149, 3107, 2961, 2881, 2658, 2543, 2360, 2340, 2128, 1645, 1575, 1451, 1398, 1340, 1169, 1072, 976 cm<sup>-1</sup>. Anal. calcd for C<sub>16</sub>H<sub>33</sub>N<sub>5</sub>O<sub>9</sub>P<sub>2</sub>·H<sub>2</sub>O: C, 37.00; H, 6.79; N, 13.48; found: C, 36.65; H, 7.09; N, 12.87.

Preparation of 2-hydroxy-*N,N,N*-trimethylethan-1-aminium hydrogen (4-amino-1-hydroxy-1-phosphonobutyl)phosphonate, [Ch][ALN] (7)

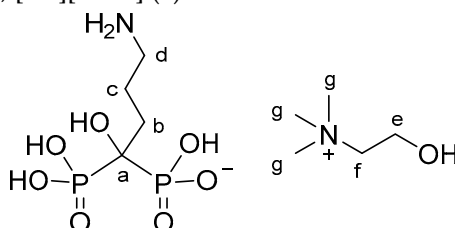

Using choline chloride (224 mg, 1.61 mmol) [Ch][ALN] was obtained as a white solid in quantitative yield (623 mg). *T<sub>m</sub>* = 141.2 °C; *T<sub>g</sub>* = 74.9 °C; <sup>1</sup>H NMR (400.13 MHz, D<sub>2</sub>O) δ 4.08–4.00 (m, 2H, e), 3.53–3.46 (m, 2H, f), 3.18 (s, 9H, g), 3.06–2.98 (m, 2H, d), 2.05–1.93 (m, 4H, b, c). <sup>13</sup>C NMR (100.62 MHz, D<sub>2</sub>O) δ 74.1 (t, *J* = 133.1 Hz, a), 68.0 (t, *J* = 3.1 Hz, f), 56.2 (e), 54.5 (t, *J* = 4.0 Hz, g), 40.6 (d), 31.2 (c), 22.8 (t, *J* = 6.8 Hz, b) ppm; FTIR (KBr) 3423, 3253, 3019, 2967, 2923, 2857, 2785, 2550, 2359, 2341,

2101, 1646, 1489, 1478, 1400, 1163, 1059, 956, 919  $\text{cm}^{-1}$ . Anal. calcd for  $\text{C}_9\text{H}_{26}\text{N}_2\text{O}_8\text{P}_2 \cdot 2\text{H}_2\text{O}$ : C, 27.84; H, 7.79; N, 7.21; found: C, 27.43; H, 7.74; N, 6.91.

Preparation of bis(2-hydroxy-*N,N,N*-trimethylethan-1-aminium) (4-amino-1-hydroxybutane-1,1-diyl)bis(hydrogen phosphonate),  $[\text{Ch}]_2[\text{ALN}]$  (**8**)

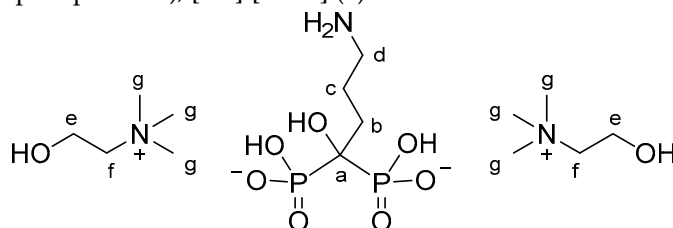

Using choline chloride (447 mg, 3.22 mmol)  $[\text{Ch}]_2[\text{ALN}]$  was obtained as a colorless paste in quantitative yield (848 mg).  $T_g = 63.8\text{ }^\circ\text{C}$ ;  $^1\text{H NMR}$  (400.13 MHz,  $\text{D}_2\text{O}$ )  $\delta$  4.10–4.02 (m, 4H, e), 3.55–3.48 (m, 4H, f), 3.19 (s, 18H, g), 3.08 – 3.00 (m, 2H, d), 2.03–1.93 (m, 4H, b, c).  $^{13}\text{C NMR}$  (100.62 MHz,  $\text{D}_2\text{O}$ )  $\delta$  74.2 (t,  $J = 127.0$  Hz, a), 68.1 (t,  $J = 3.8$  Hz, f), 56.2 (e), 54.5 (t,  $J = 4.0$  Hz, g), 40.7 (d), 31.6 (c), 23.1 (t,  $J = 7.0$  Hz, b) ppm; FTIR (KBr) 3266, 3018, 2959, 2901, 2785, 2663, 2528, 2357, 2342, 2137, 1646, 1478, 1346, 1267, 1167, 1090, 1057, 1006, 970, 949  $\text{cm}^{-1}$ . Anal. calcd for  $\text{C}_{14}\text{H}_{39}\text{N}_3\text{O}_9\text{P}_2 \cdot 7\text{H}_2\text{O}$ : C, 28.92; H, 9.19; N, 7.23; found: C, 28.48; H, 9.02; N, 6.90.

*NMR Spectra of ALN-OSILs*

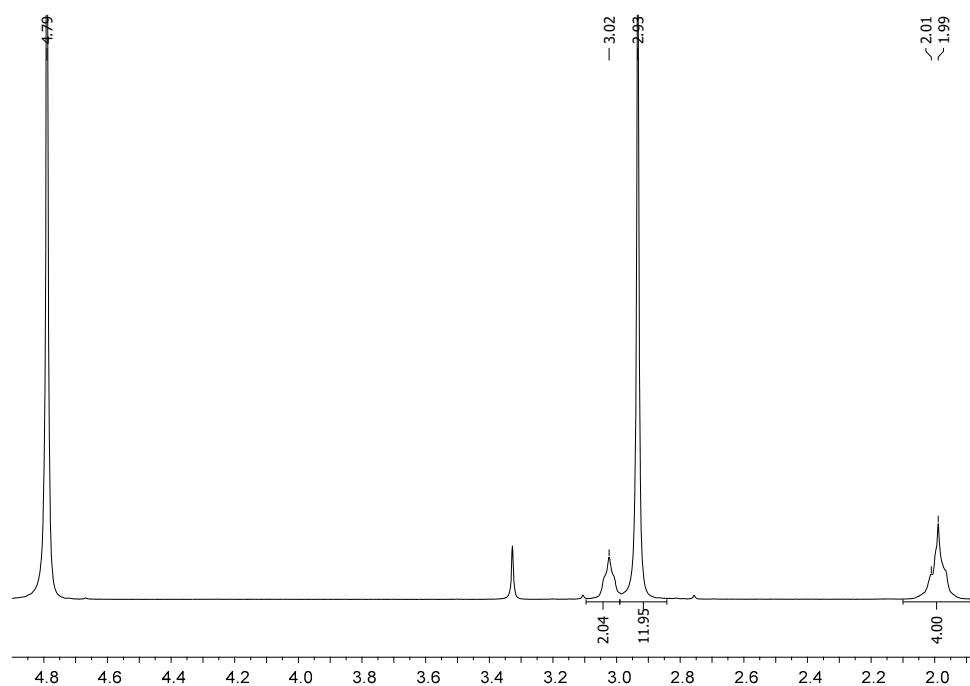

**Figure S1.**  $^1\text{H NMR}$  spectra of  $[\text{TMGH}][\text{ALN}]$ .

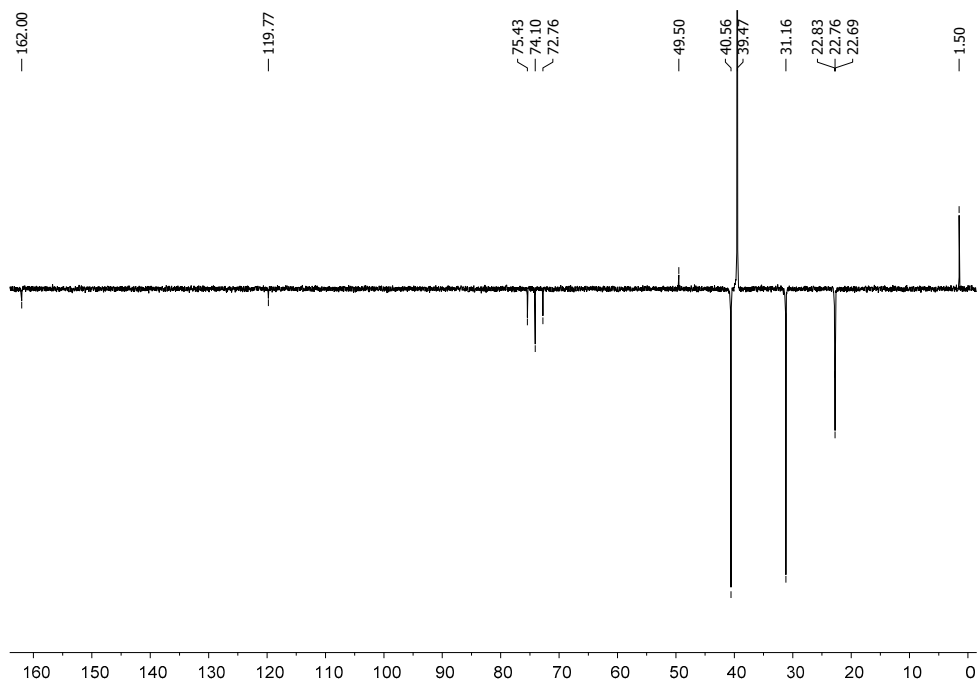

Figure S2.  $^{13}\text{C}$  NMR spectra of [TMGH][ALN].

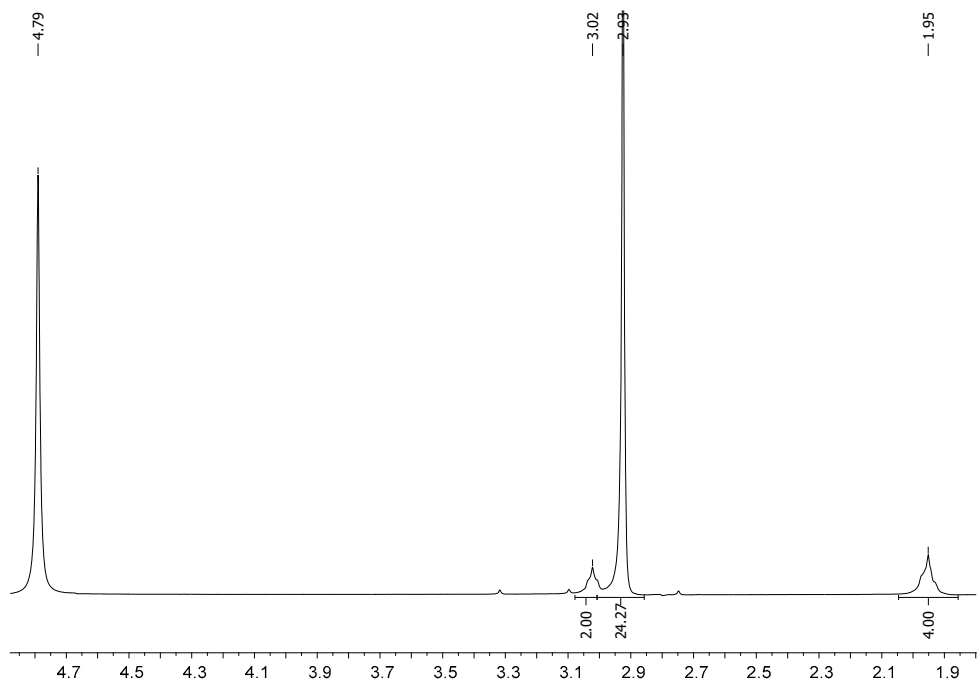

Figure S3.  $^1\text{H}$  NMR spectra of [TMGH] $_2$ [ALN].

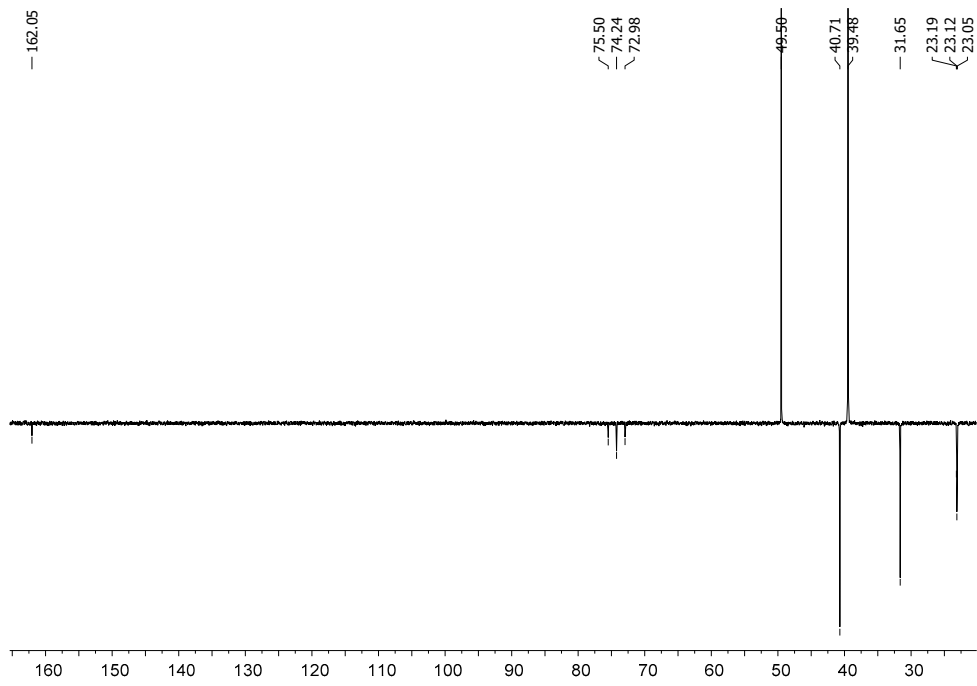

Figure S4.  $^{13}\text{C}$  NMR spectra of  $[\text{TMGH}]_2[\text{ALN}]$ .

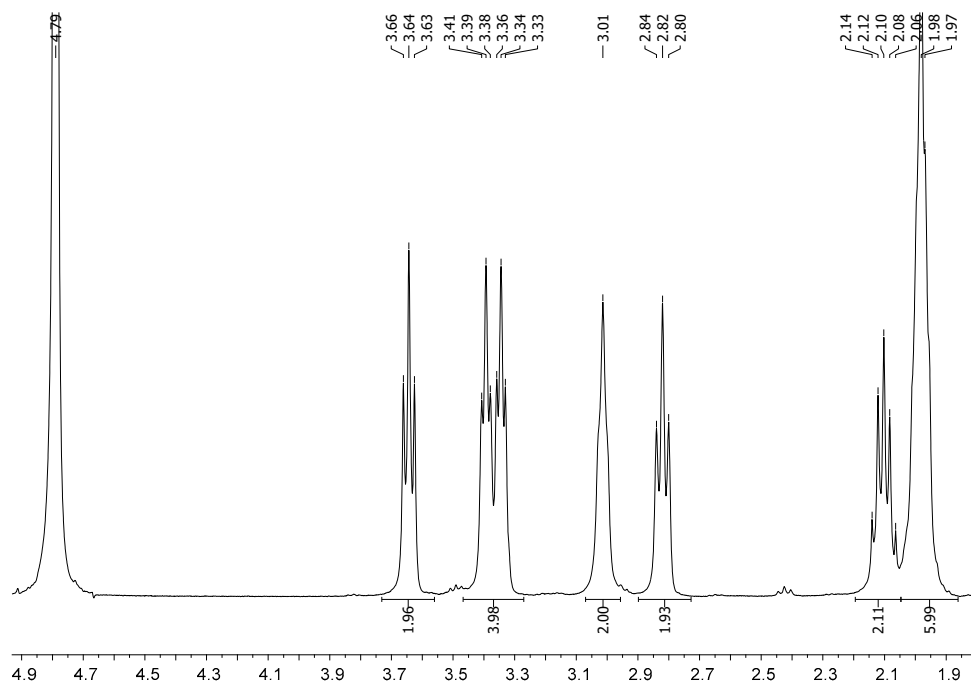

Figure S5.  $^1\text{H}$  NMR spectra of  $[\text{DBNH}][\text{ALN}]$ .

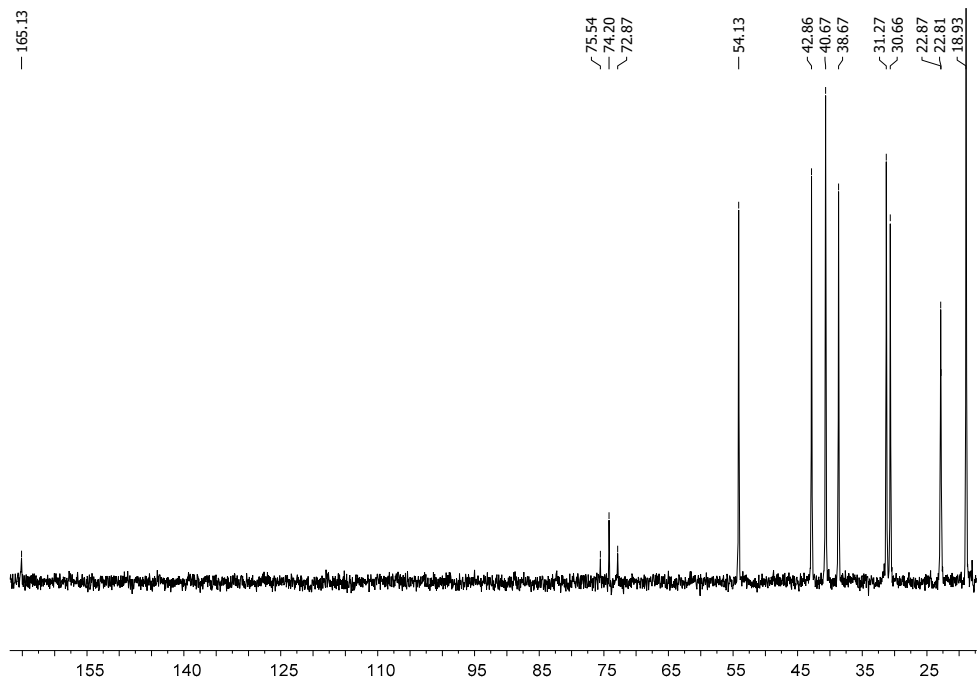

Figure S6.  $^{13}\text{C}$  NMR spectra of [DBNH][ALN].

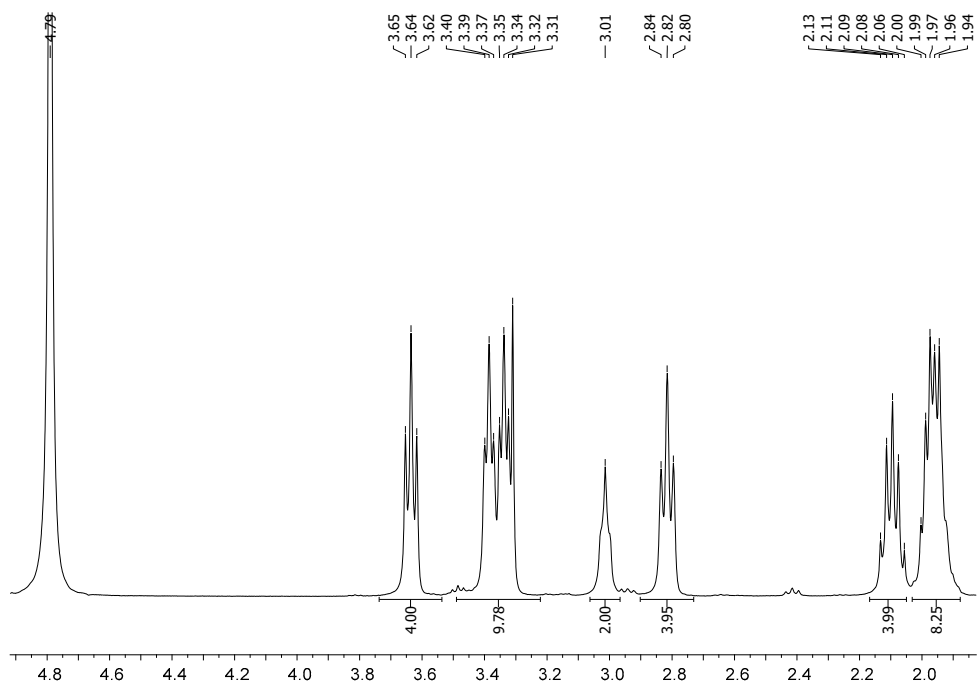

Figure S7.  $^1\text{H}$  NMR spectra of [DBNH] $_2$ [ALN].

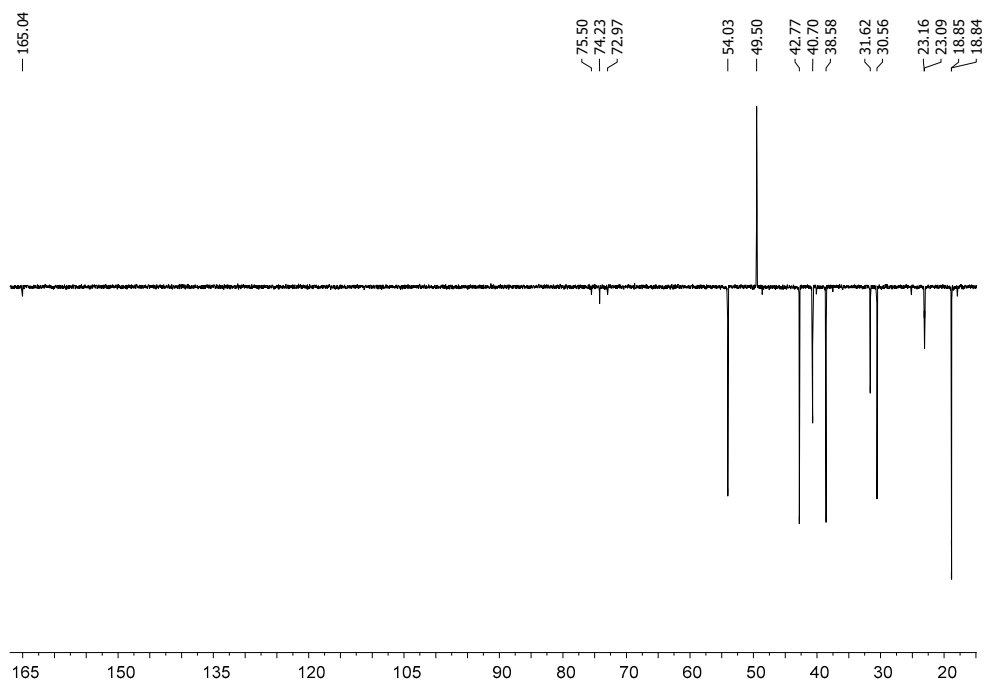

Figure S8.  $^{13}\text{C}$  NMR spectra of  $[\text{DBNH}]_2[\text{ALN}]$ .

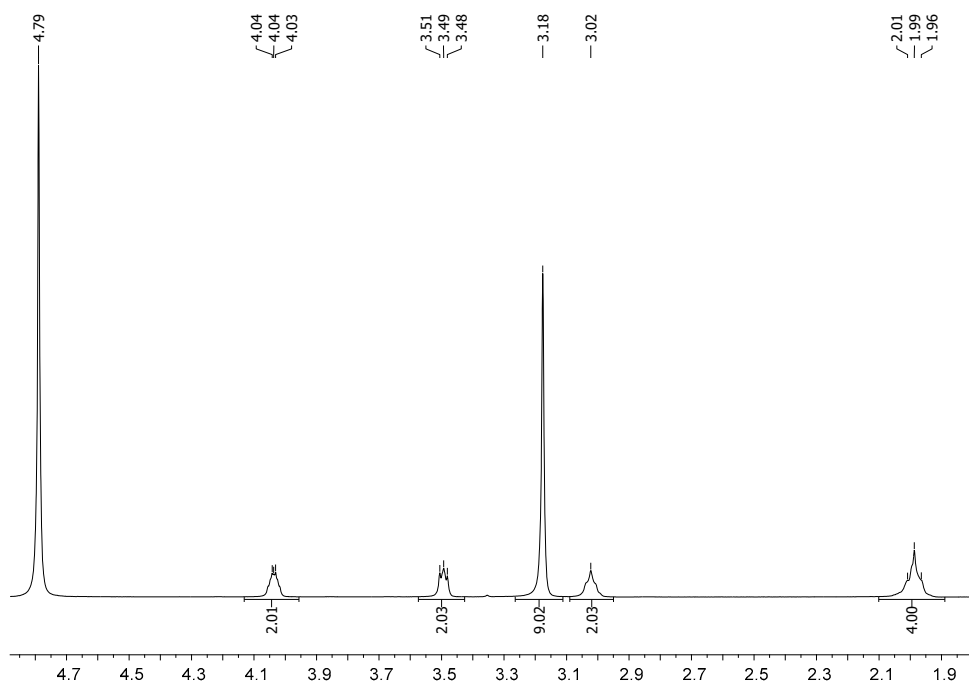

Figure S9.  $^1\text{H}$  NMR spectra of  $[\text{Ch}][\text{ALN}]$ .



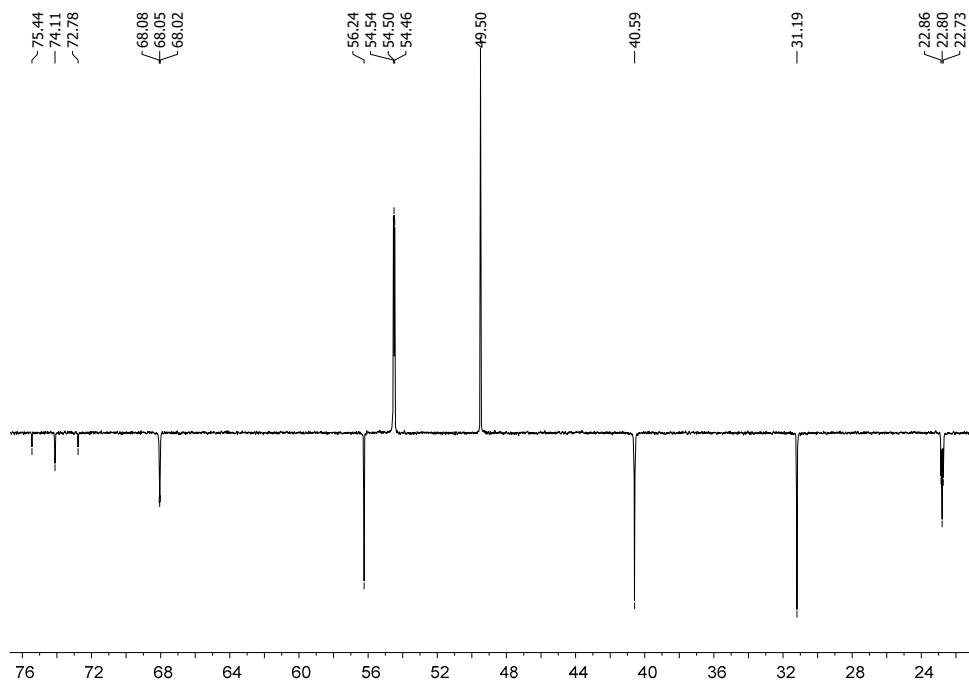

Figure S10.  $^{13}\text{C}$  NMR spectra of [Ch][ALN].

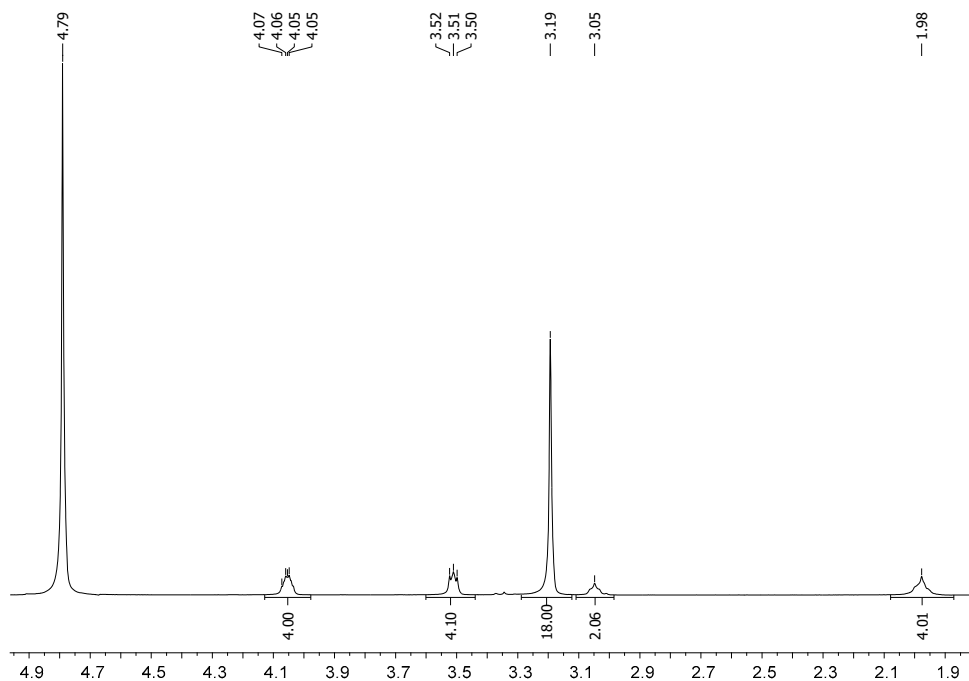

Figure S11.  $^1\text{H}$  NMR spectra of [Ch] $_2$ [ALN].

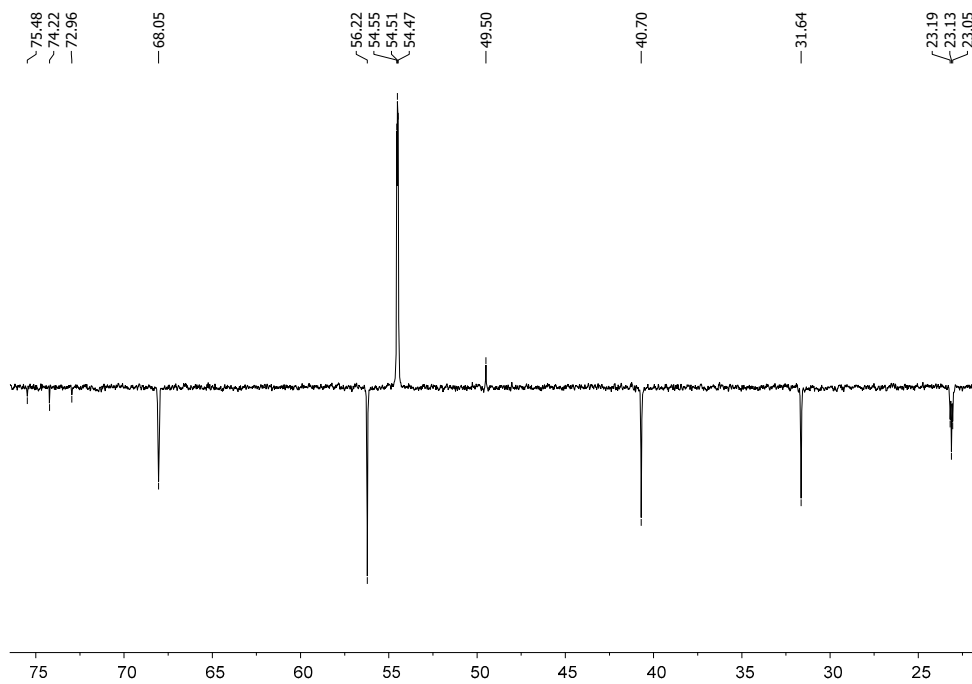

Figure S12.  $^{13}\text{C}$  NMR spectra of  $[\text{Ch}]_2[\text{ALN}]$ .

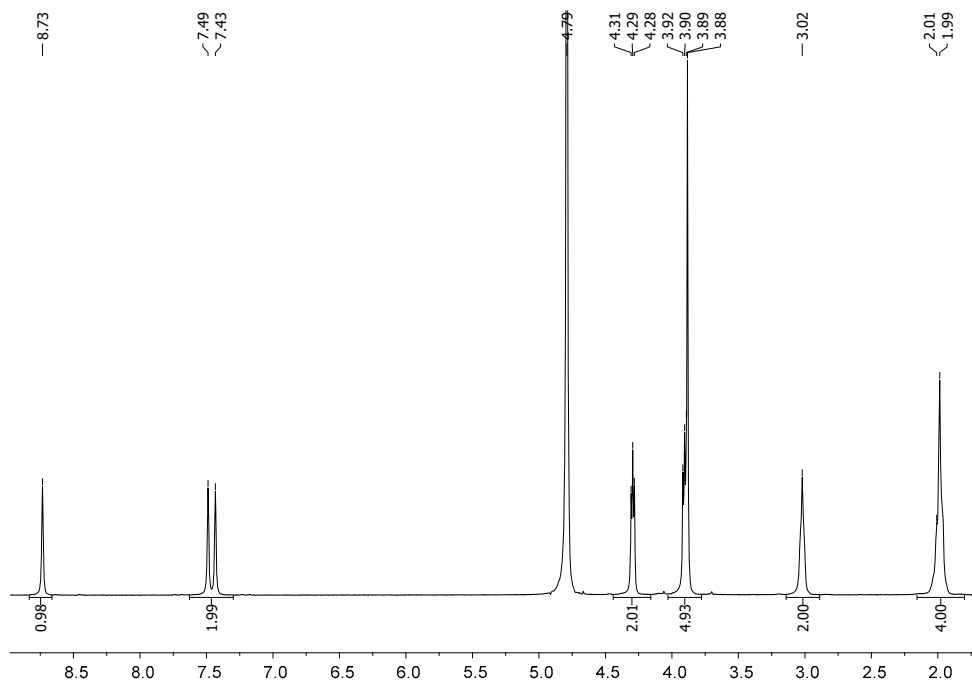

Figure S13.  $^1\text{H}$  NMR spectra of  $[\text{C}_2\text{OHMIM}][\text{ALN}]$ .

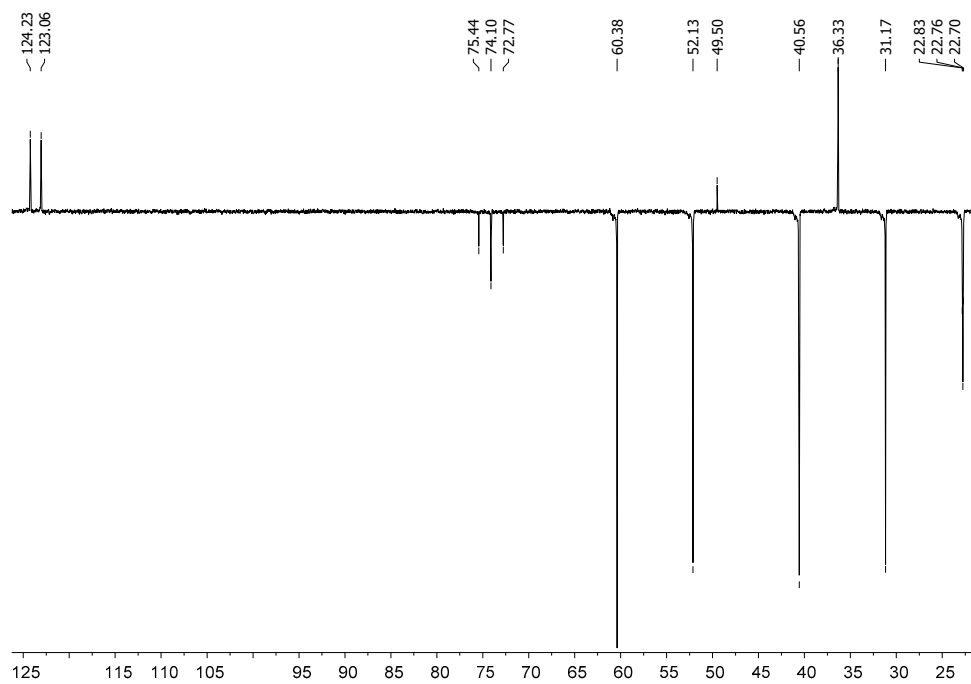

Figure S14.  $^{13}\text{C}$  NMR spectra of  $[\text{C}_2\text{OHMIM}][\text{ALN}]$ .

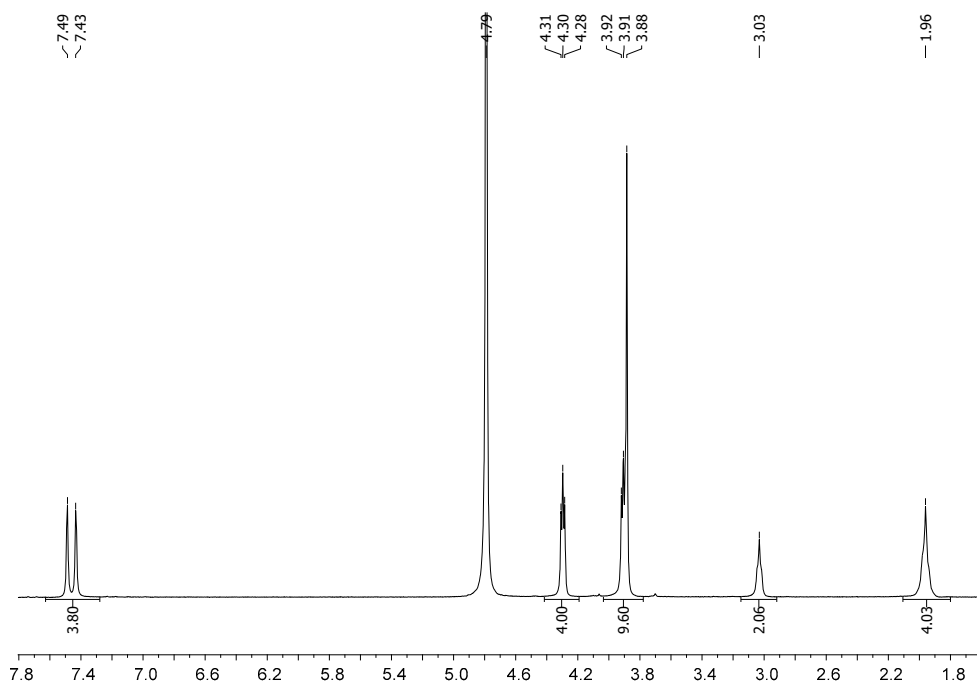

Figure S15.  $^1\text{H}$  NMR spectra of  $[\text{C}_2\text{OHMIM}]_2[\text{ALN}]$ .

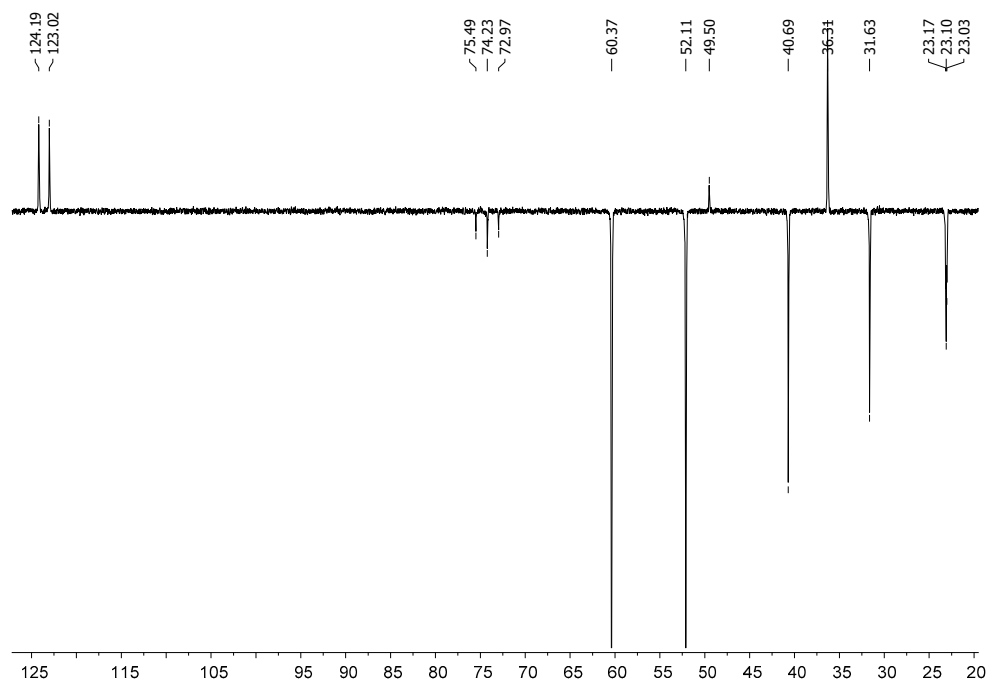

**Figure S16.**  $^{13}\text{C}$  NMR spectra of  $[\text{C}_2\text{OHMIM}]_2[\text{ALN}]$ .

FTIR Spectra of ALN-OSILs

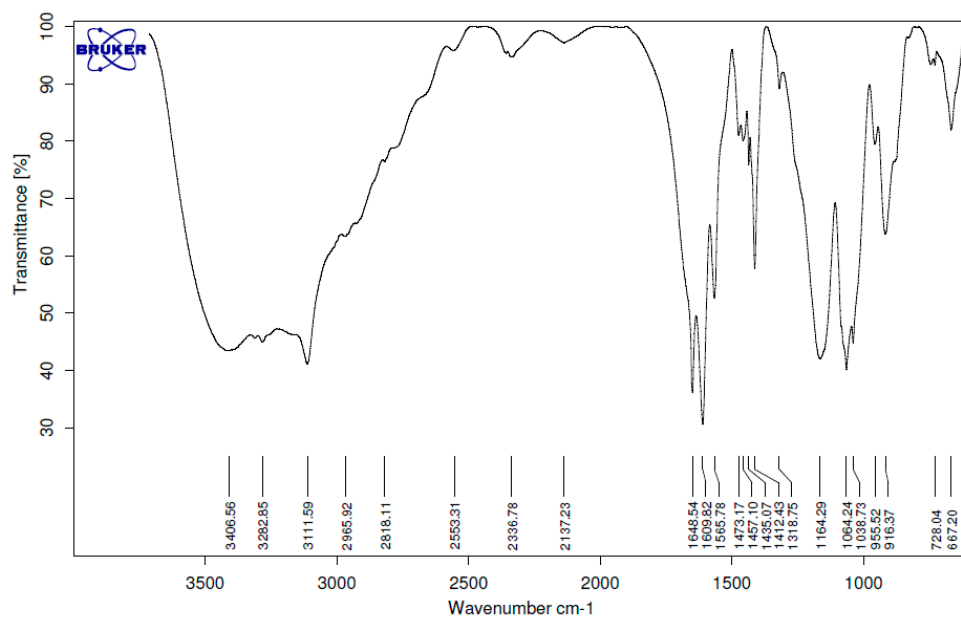

Figure S17. FTIR spectra of [TMGH][ALN].

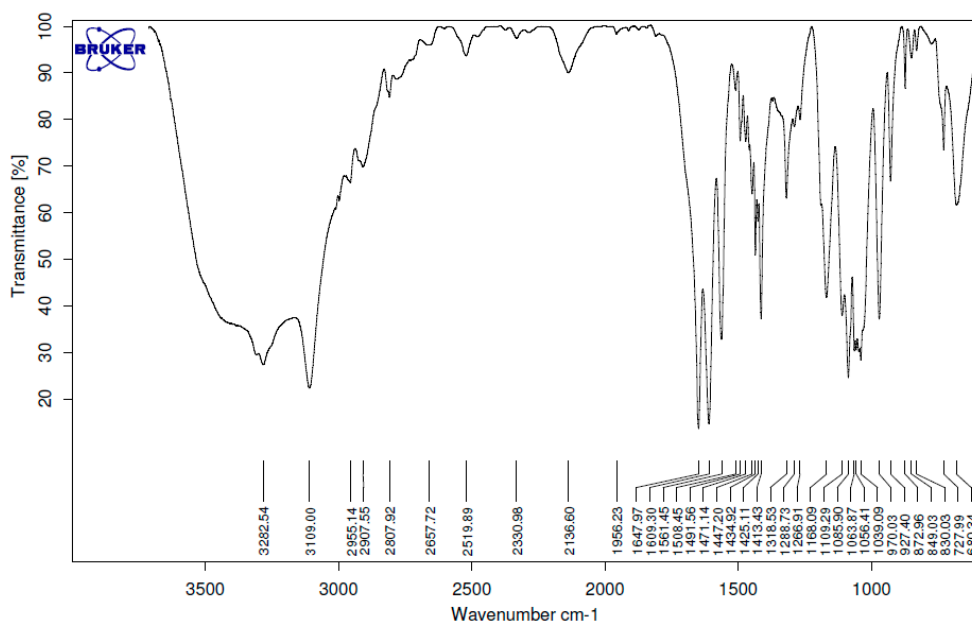

Figure S18. FTIR spectra of [TMGH]<sub>2</sub>[ALN].

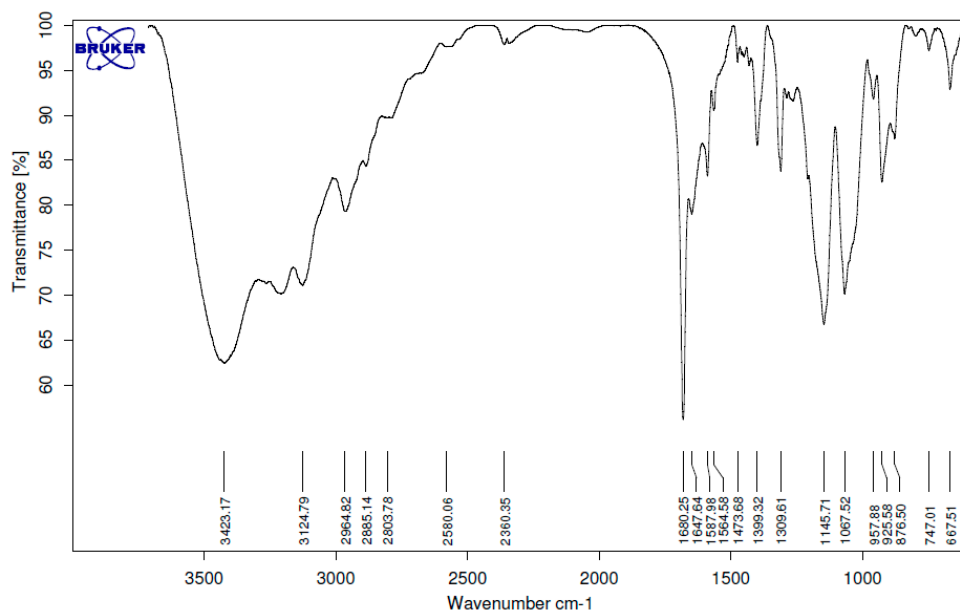

Figure S19. FTIR spectra of [DBNH][ALN].

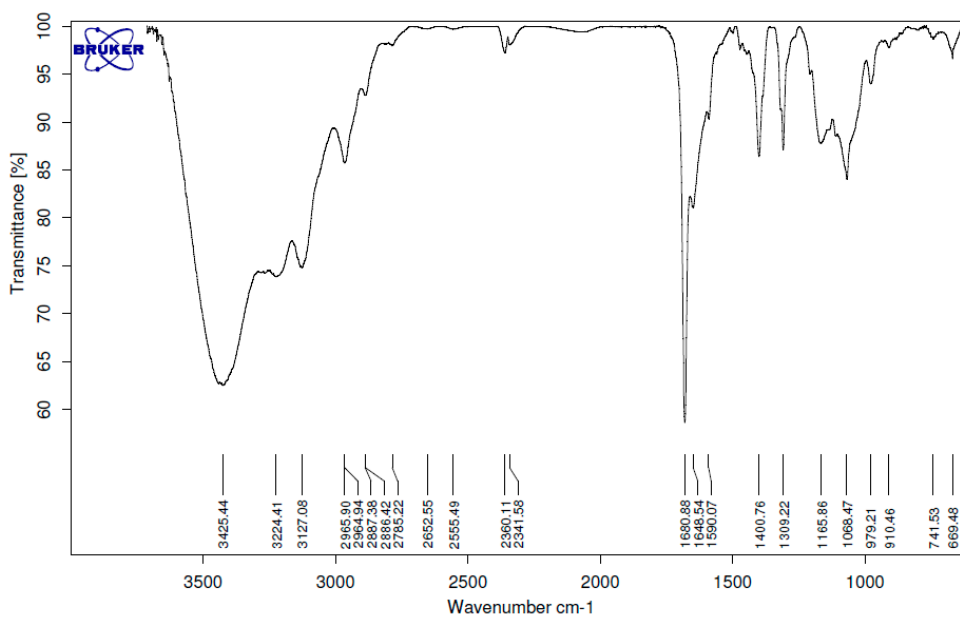

Figure S20. FTIR spectra of [DBNH]<sub>2</sub>[ALN].

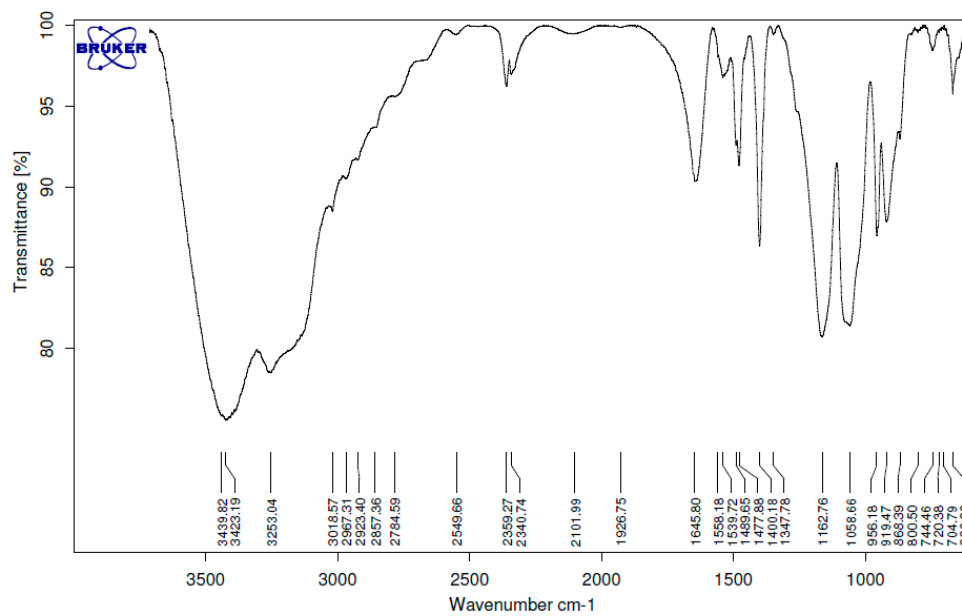

Figure S21. FTIR spectra of [Ch][ALN].

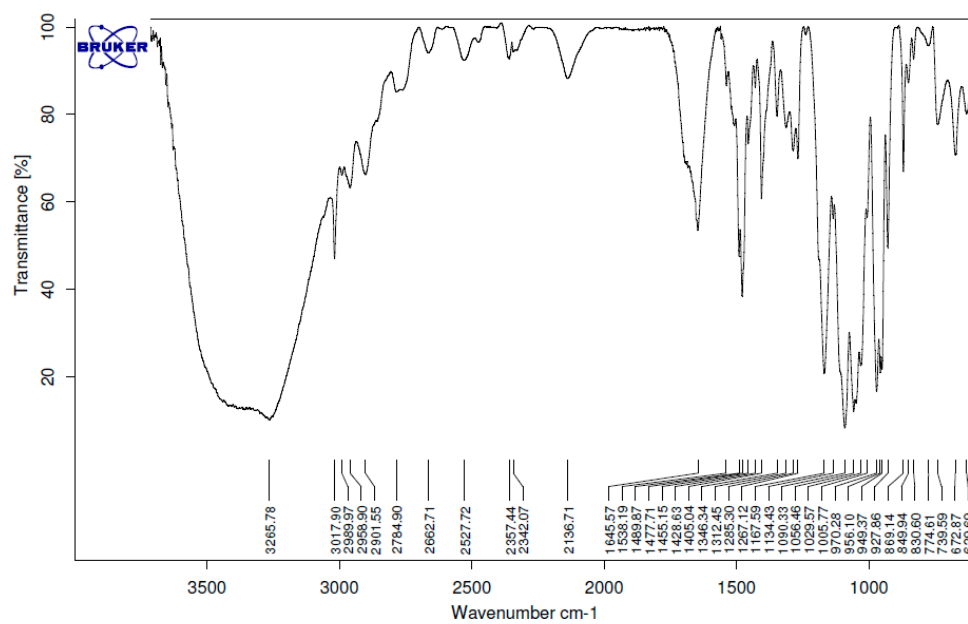

Figure S22. FTIR spectra of [Ch]<sub>2</sub>[ALN].

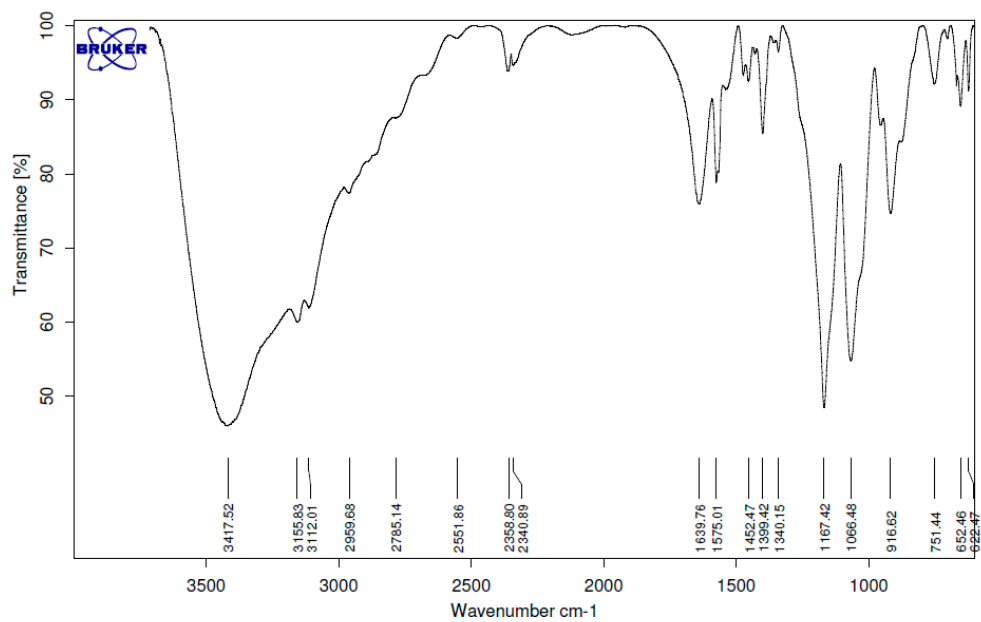

Figure S23. FTIR spectra of [C<sub>2</sub>OHMIM][ALN].

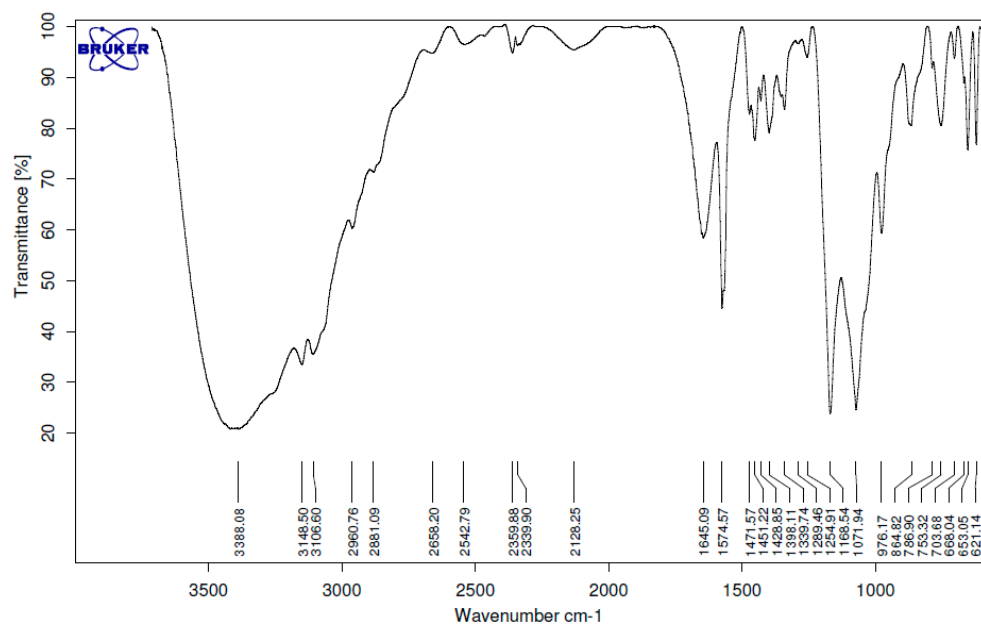

Figure S24. FTIR spectra of [C<sub>2</sub>OHMIM]<sub>2</sub>[ALN].



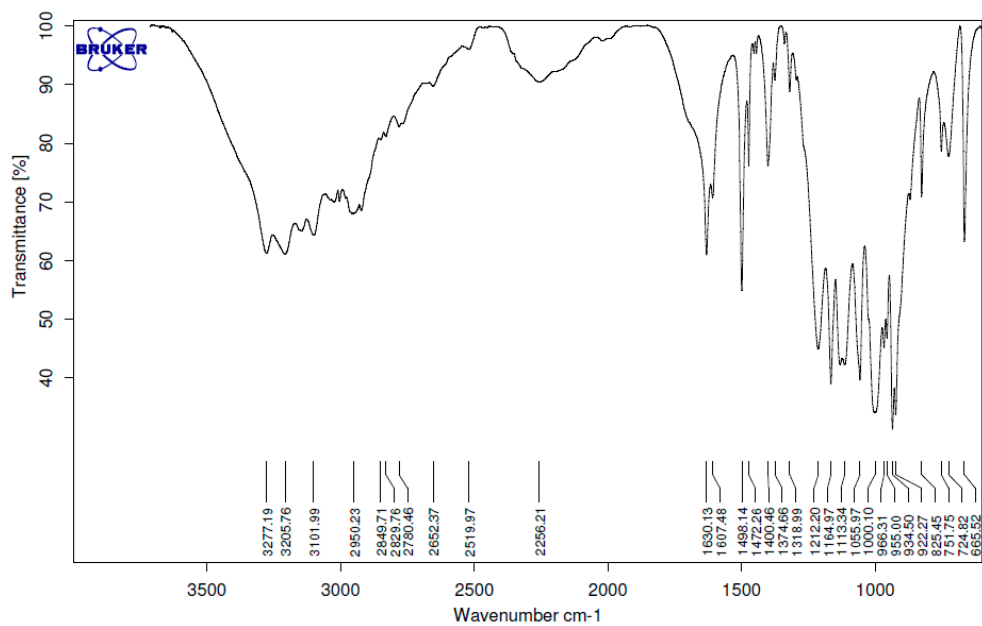

Figure S25. FTIR spectra of alendronic acid.

*DSC Thermograms of ALN-OSILs*

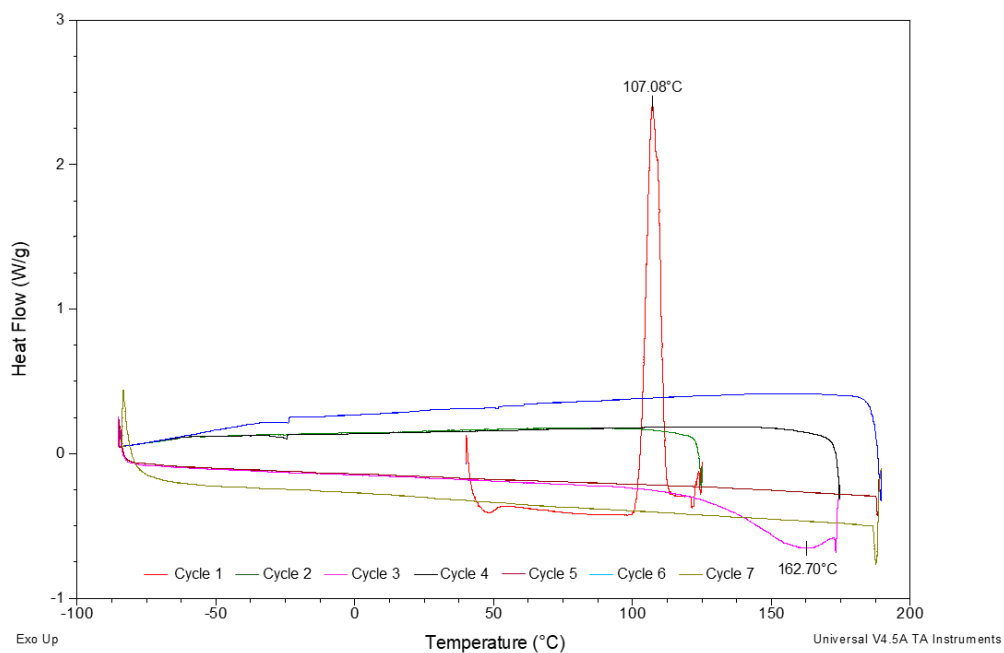

Figure S26. DSC thermogram of [TMGH][ALN].

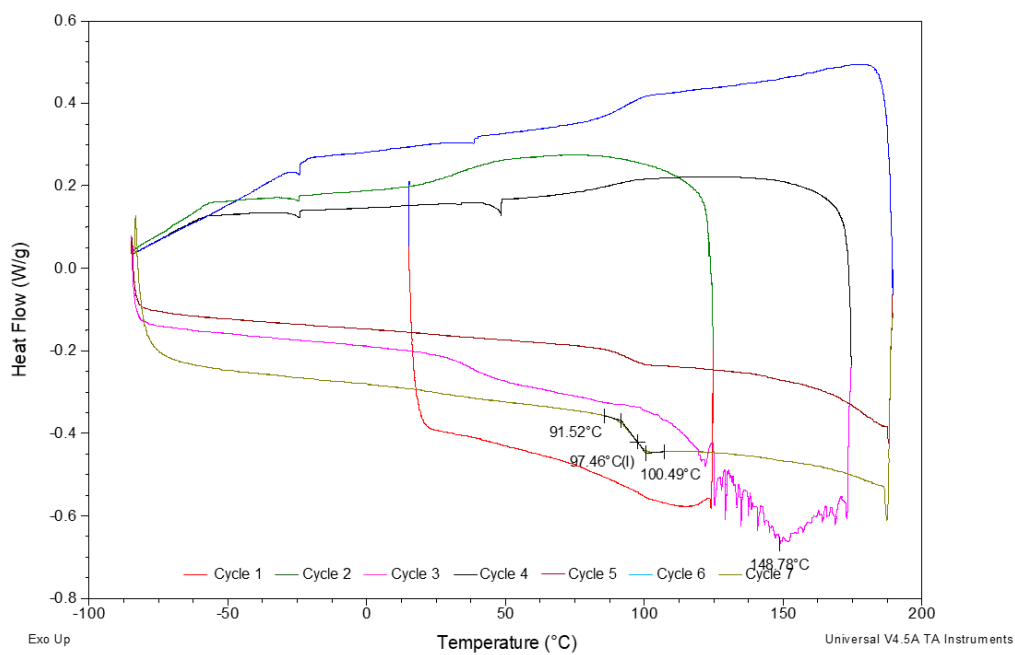

**Figure S27.** DSC thermogram of [TMGH]<sub>2</sub>[ALN].

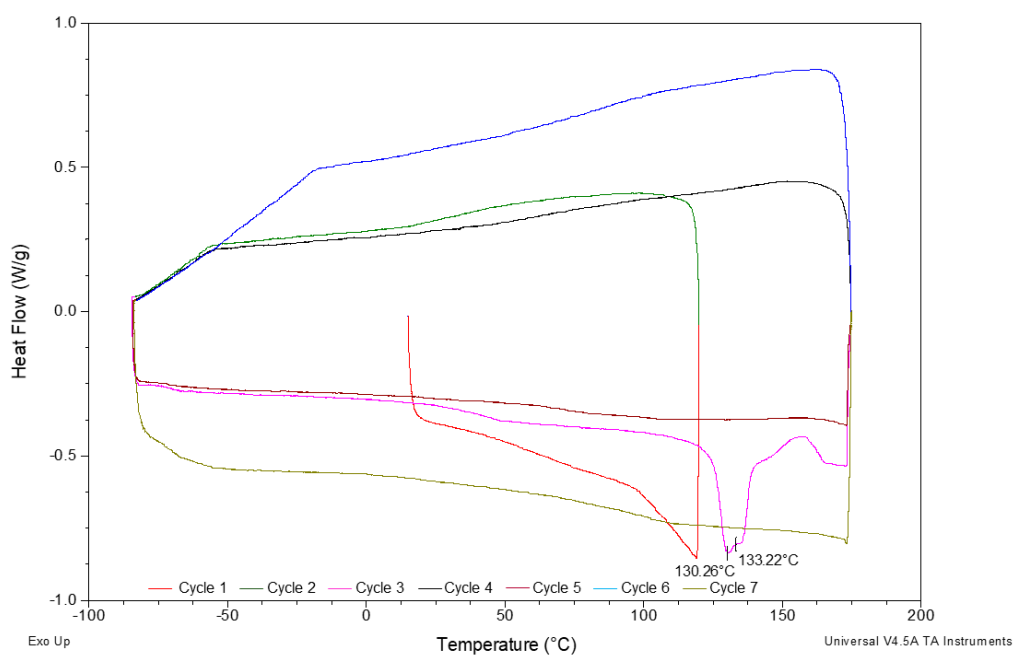

**Figure S28.** DSC thermogram of [DBNH][ALN].

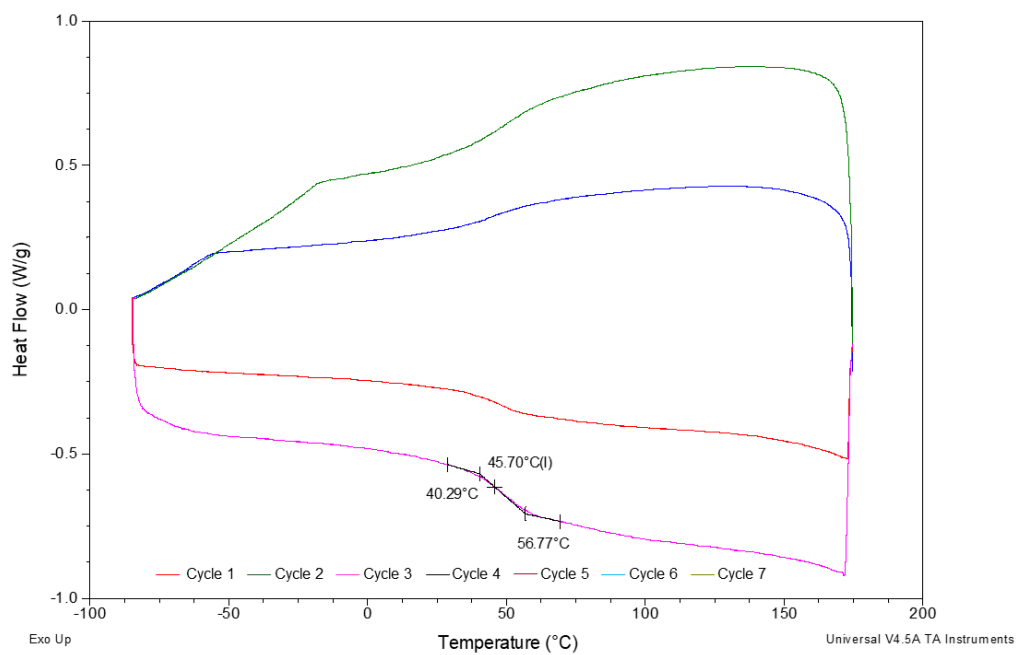

**Figure S29.** DSC thermogram of [DBNH]<sub>2</sub>[ALN].

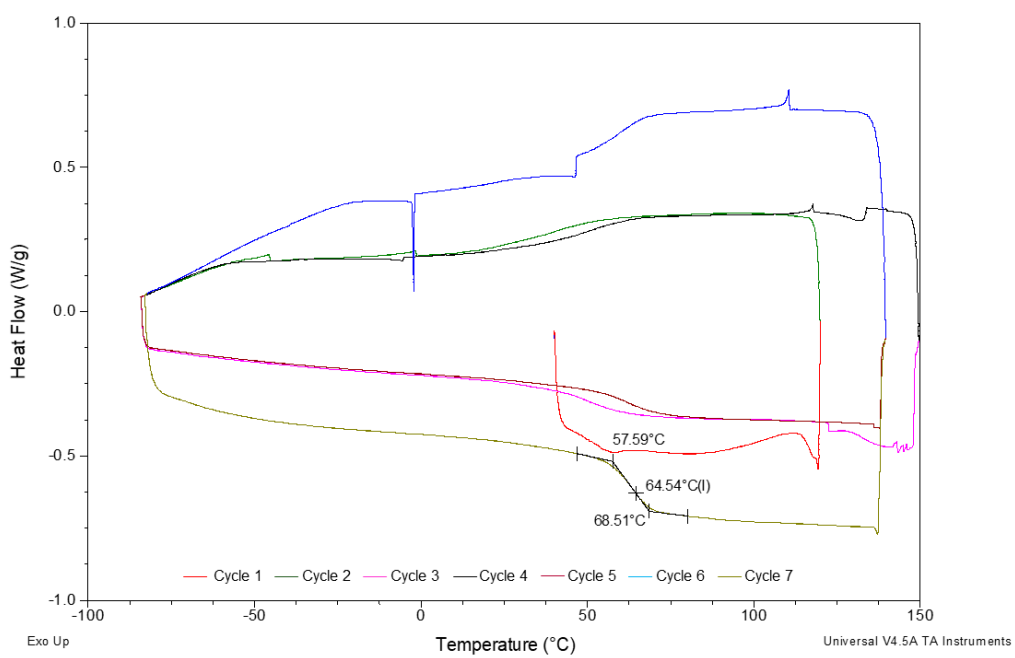

**Figure S30.** DSC thermogram of [C<sub>2</sub>OHMIM][ALN].

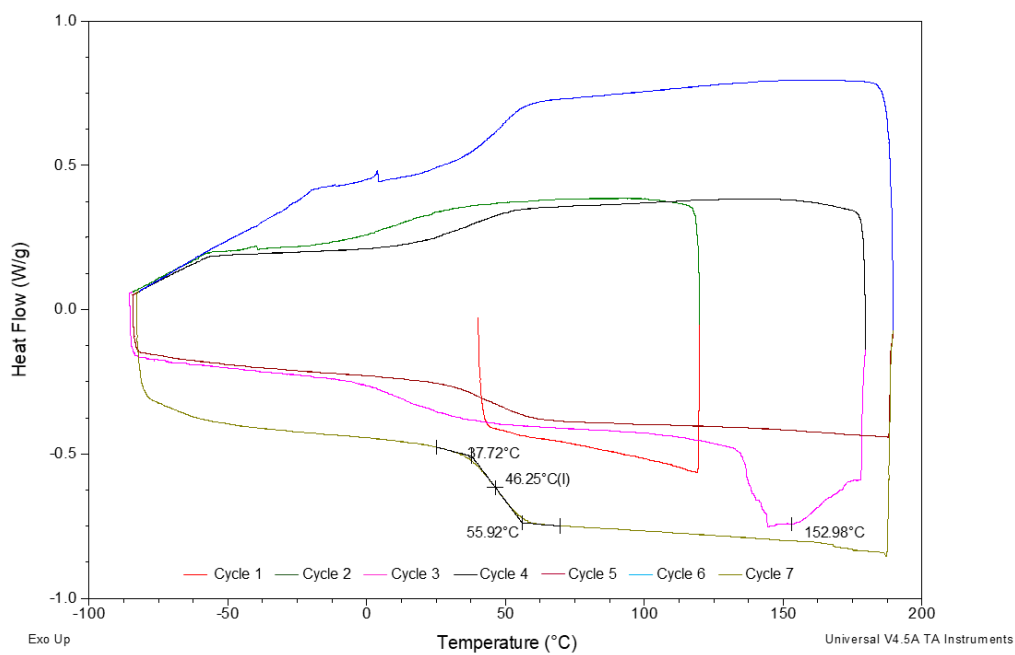

**Figure S31.** DSC thermogram of  $[C_2OHMIM]_2[ALN]$ .

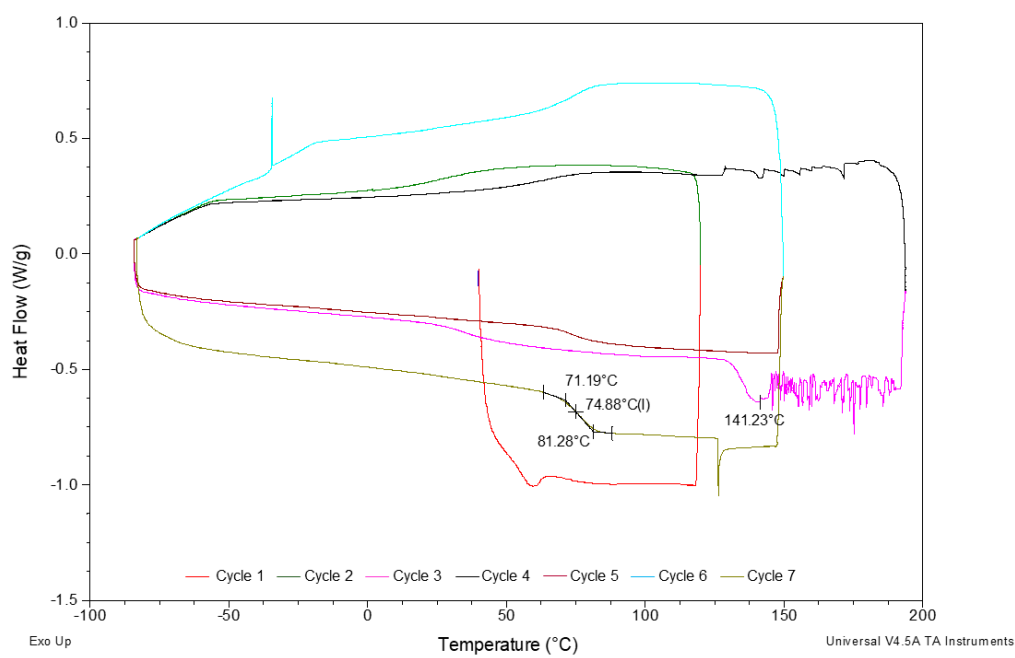

**Figure S32.** DSC thermogram of  $[Ch][ALN]$ .

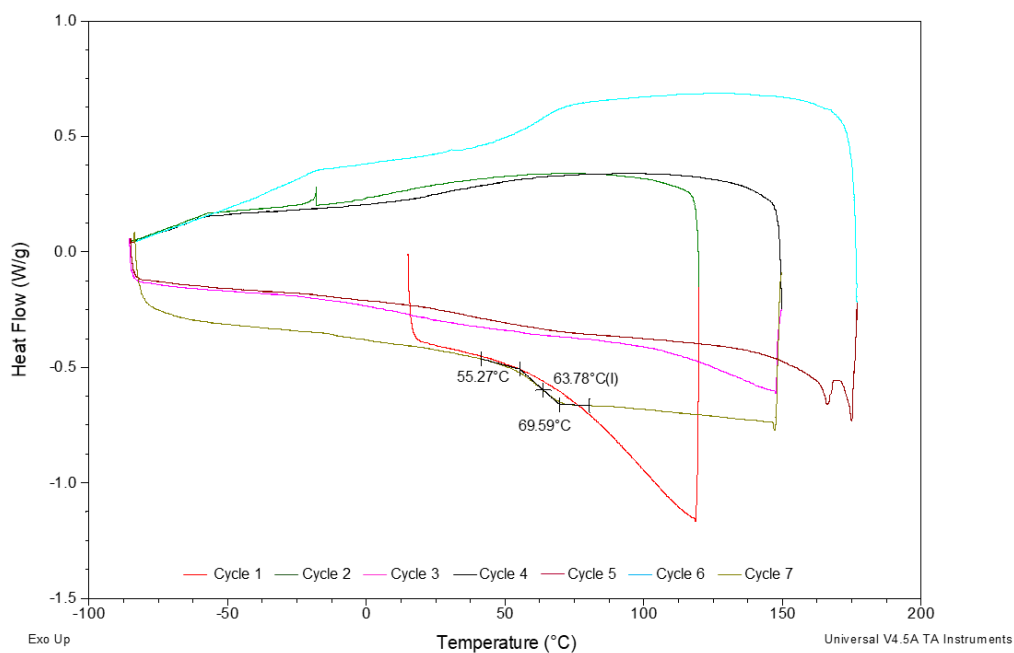

**Figure S33.** DSC thermogram of [Ch]<sub>2</sub>[ALN].

### *Cytotoxicity Studies*

The antiproliferative effects of the developed OSILs was assessed on different cell types: human gingival fibroblasts (non-neoplastic control), ductal breast epithelial cancer cells (T47D cell line), lung carcinoma cells (A549 cell line) and osteosarcoma cells (MG63 cell line). Cells were seeded at  $10^4$  cells/cm<sup>2</sup>, and maintained in  $\alpha$ -minimal essential medium ( $\alpha$ -MEM) supplemented with 10% fetal bovine serum, 100 IU/mL penicillin, 2.5  $\mu$ g/mL streptomycin, 2.5  $\mu$ g/mL amphotericin B, and 50  $\mu$ g/mL ascorbic acid. After 24 h of incubation, culture medium was renewed and supplemented with the different ALN-containing OSILs. Paclitaxel, a well-known cytotoxic agent, was used as a positive control. Cell cultures were maintained in a 5% CO<sub>2</sub> humidified atmosphere at 37 °C for 24 h and 72 h.

Cellular viability/proliferation was evaluated by MTT assay, which relies in the reduction of 3-(4,5-dimethylthiazol-2-yl)-2,5-diphenyltetrazolium bromide to a purple formazan product by viable cells. Half-maximal inhibitory concentration (IC<sub>50</sub>) values were calculated by means of a nonlinear regression analysis of concentration-effect curves, using GraphPad Prism software (version 2012).
